# Supplementary figures and images for: DNMT3A and DNMT3B Targeting as an Effective Radiosensitizing Strategy in Embryonal Rhabdomyosarcoma
Source: MDPI journal article supplement (doi:10.3390/cells10112956), 2021-10-30

**a**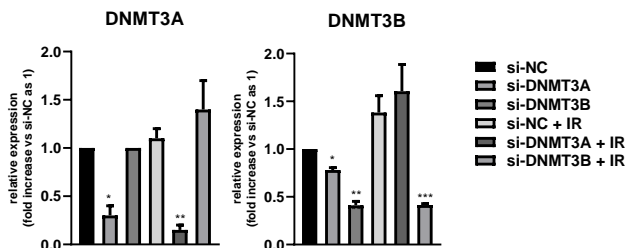**b**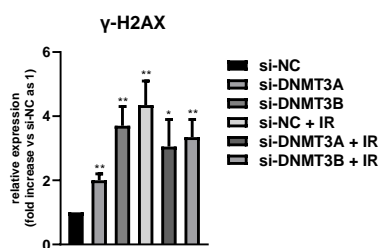**c**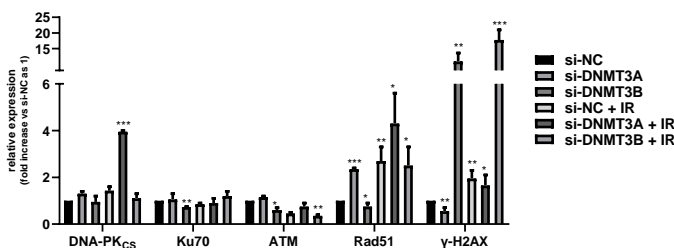**d**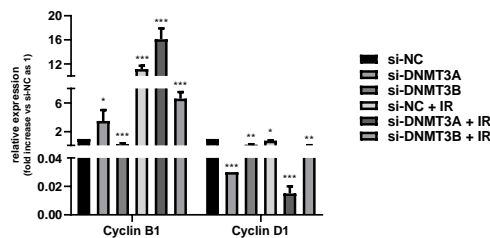**e**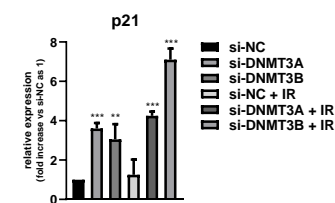**f**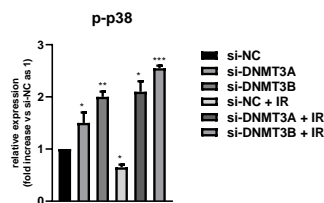**g**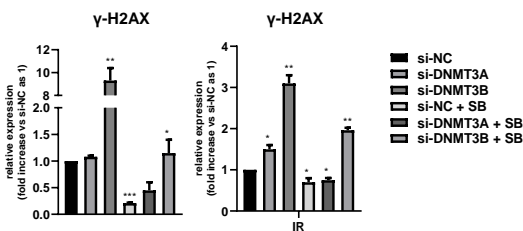**h**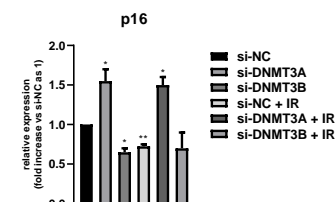**i**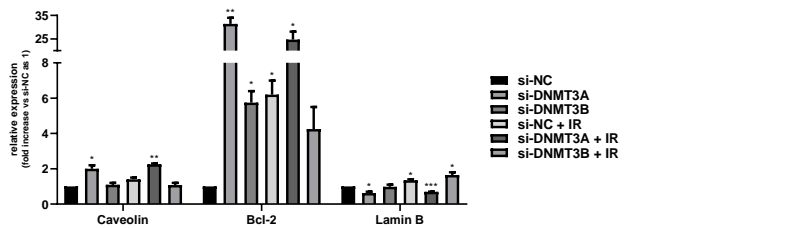**j**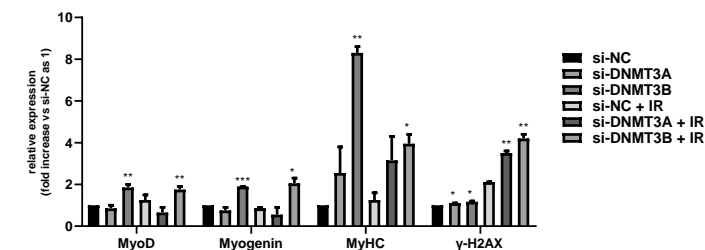

Supplement: s1 [file s1]

**a**

si-NC

si-DNMT3A

si-DNMT3B

0 Gy

4 Gy

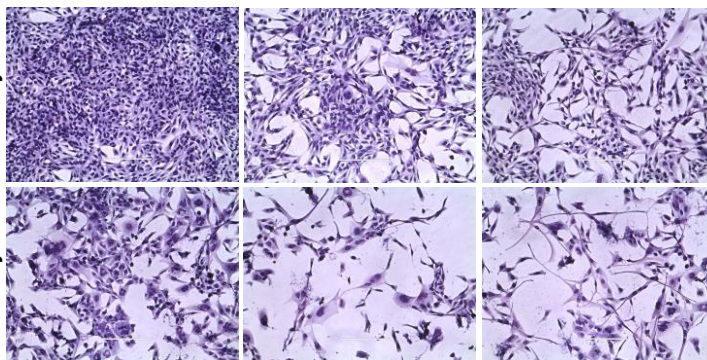**b**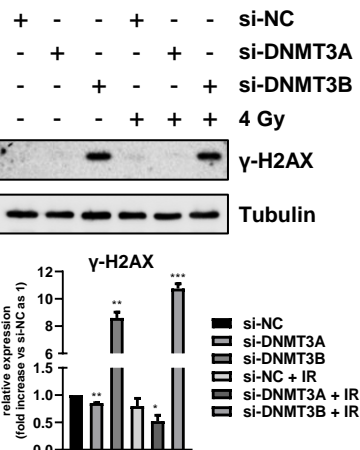**c**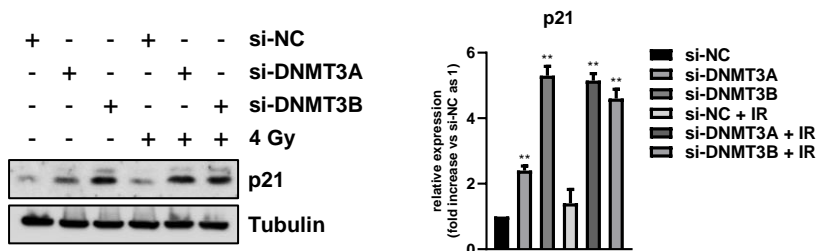**d**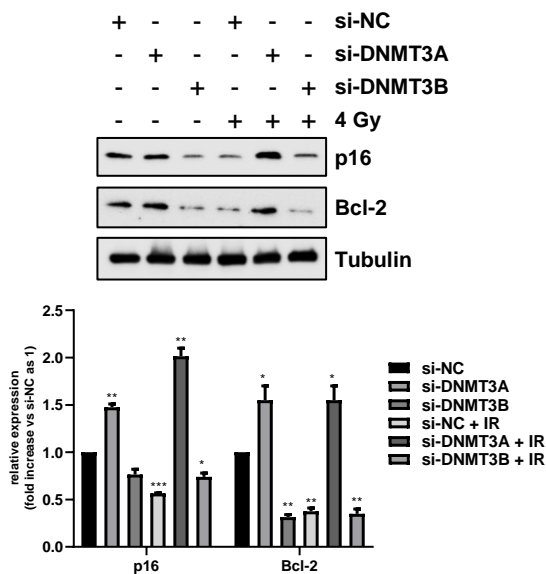**e**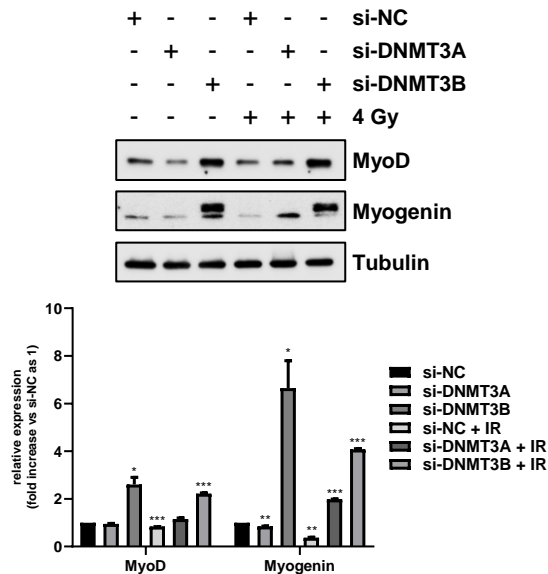

Supplement: s1 [file s1]

0 Gy

4 Gy

si-NC

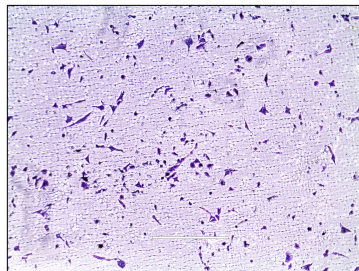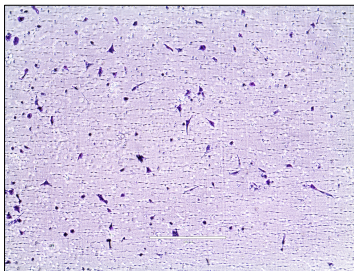

si-DNMT3A

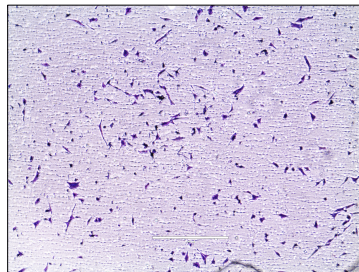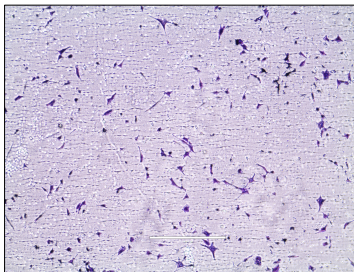

si-DNMT3B

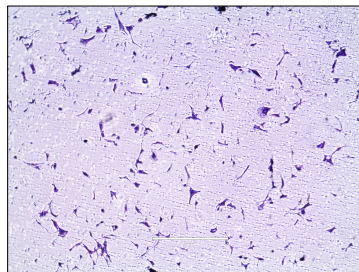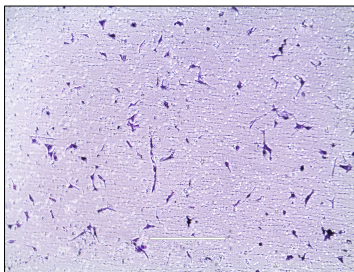

si-NC si-DNMT3A si-DNMT3B

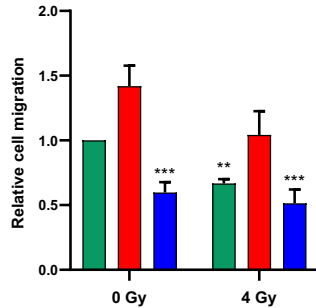

Supplement: s1 [file s1]
